# Supplementary material for: The preparation of tubular heterostructures based on titanium dioxide and silica nanotubes and their photocatalytic activity
Source: Royal Society of Chemistry journal article supplement (doi:10.1039/c3dt51959g), 2013-10-31
Supplement: c3dt51959g.pdf [file c3dt51959g.pdf]

## Supporting Information

### The preparation of tubular heterostructures based on titanium dioxide and silica nanotubes and their photocatalytic activity

Pan Wang<sup>a</sup>, MingLiang Du<sup>\*a,b</sup>, Ming Zhang<sup>a,b</sup>, Han Zhu<sup>a</sup>, and Shiyong Bao<sup>a</sup>

<sup>a</sup>Department of Materials Engineering, College of Materials and Textile, Zhejiang Sci-Tech University, Hangzhou 310018, P. R. China

<sup>b</sup>Key Laboratory of Advanced Textile Materials and Manufacturing Technology, Zhejiang Sci-Tech University, Ministry of Education, Hangzhou 310018, P. R. China  
E-mail: [du@zstu.edu.cn](mailto:du@zstu.edu.cn)

#### Results and discussion

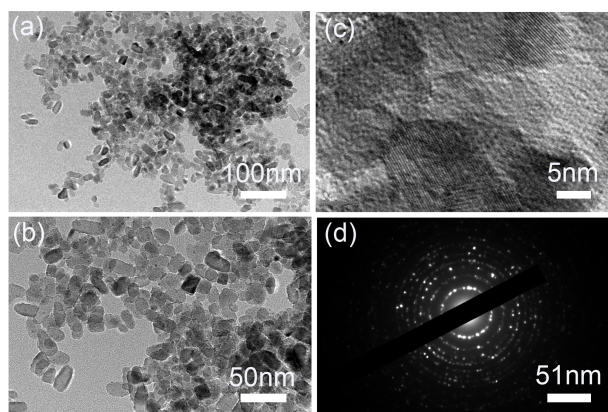

Fig. S1 The TEM images of pure TiO<sub>2</sub>.

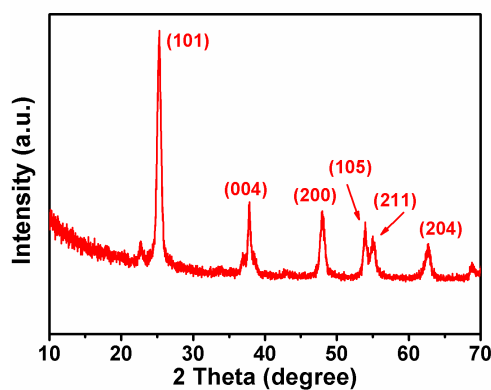

Fig. S2 The XRD patterns of pure TiO<sub>2</sub>.

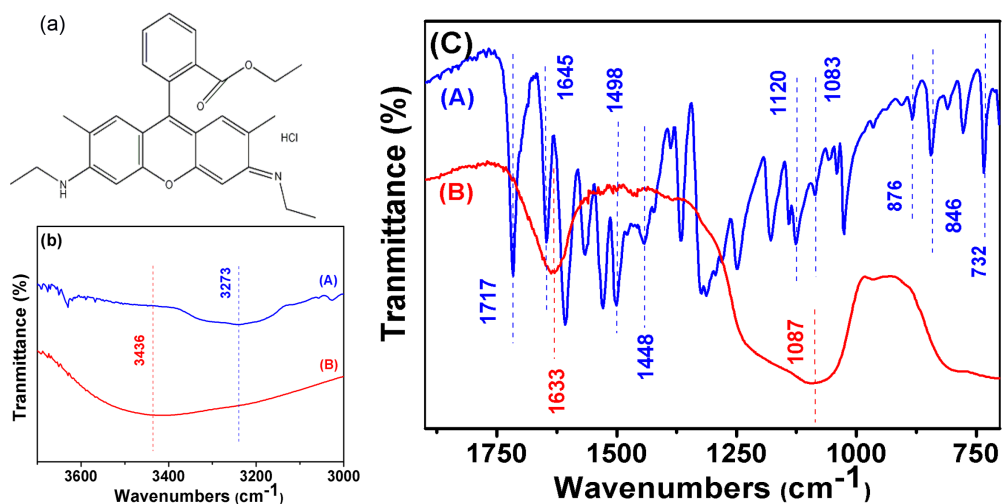

**Fig. S3** (a) The constitutional formula of Rhodamine 6G; (b) and (c) The FT-IR spectra of Rhodamine 6G (curve (A)) and TiO<sub>2</sub>/SNTs heterostructures after photocatalytic reaction (curve (B)).

Among them,

Rhodamine 6G: 3273 cm<sup>-1</sup> (-NH-), 1717 cm<sup>-1</sup> (-COO-), 1645 - 1498 cm<sup>-1</sup> (-C=N-),  
1448 cm<sup>-1</sup> (-CH<sub>3</sub>), 1120 - 1083 cm<sup>-1</sup> (C-O-C),  
876 - 846 cm<sup>-1</sup> (1,2,4,5 - tetrasubstituted of benzene),  
732 cm<sup>-1</sup> (1,2 - disubstituted of benzene).
